# Supplementary material for: A Texture Based Pattern Recognition Approach to Distinguish Melanoma from Non-Melanoma Cells in Histopathological Tissue Microarray Sections
Source: PLoS One. 2013 May 17;8(5):e62070. doi: 10.1371/journal.pone.0062070 (PMC3656869; doi:10.1371/journal.pone.0062070)
Supplement: Table S1 — Descriptive statistics of all texture and morphological measurements made by CellProfiler modules extracted from non-melanoma and melanoma cell nuclei in the discovery TMA. Last 3 columns summarise the univariate T-test of equality of means with a * denoting all significant features (p-value<0.05) and ** denoting the top most discriminative features (highlighted in bold). (XLSX) [file pone.0062070.s007.xlsx]

## Sheet: Sheet1
		Group Statistics				T test of equality of the mean
	Class	N	Mean	Std. Deviation	Std. Error Mean	t	Sig. (2-tailed)
AreaShape_Compactness	TUMOUR	386	1.4733	0.633285	0.0322334	-4.817	<0.001 *
	OTHER	383	1.75734	0.968371	0.0494814	-4.81
AreaShape_Eccentricity	TUMOUR	386	0.781536	0.161362	0.00821311	-1.936	0.053
	OTHER	383	0.802603	0.139507	0.0071285	-1.937
AreaShape_Extent	TUMOUR	386	0.637	0.1426	0.0073	9.601	<0.001 *
	OTHER	383	0.536	0.1512	0.0077	9.599
AreaShape_FormFactor	TUMOUR	386	0.632675	0.19497	0.0099237	10.411	<0.001 *
	OTHER	383	0.481751	0.206895	0.0105718	10.409
AreaShape_MajorAxisLength	TUMOUR	386	14.4211	7.5463	0.384097	2.14	0.033
	OTHER	383	13.3051	6.89529	0.352333	2.141
AreaShape_MinorAxisLength	TUMOUR	386	7.53611	3.11595	0.158598	3.562	<0.001 *
	OTHER	383	6.77931	2.76311	0.141188	3.564
AreaShape_Solidity	TUMOUR	386	0.857865	0.0915384	0.00465918	10.819	<0.001 *
	OTHER	383	0.767298	0.136406	0.00697003	10.803
AreaShape_Zernike_0_0	TUMOUR	386	0.595946	0.213162	0.0108497	6.226	<0.001 *
	OTHER	383	0.503087	0.200146	0.010227	6.228
AreaShape_Zernike_1_1	TUMOUR	386	0.0635765	0.0394912	0.00201005	-1.797	0.073
	OTHER	383	0.0687733	0.0407095	0.00208016	-1.797
AreaShape_Zernike_2_0	TUMOUR	386	0.10092	0.0489245	0.00249019	3.745	<0.001 *
	OTHER	383	0.0878503	0.0478344	0.00244422	3.746
AreaShape_Zernike_2_2	TUMOUR	386	0.0953596	0.0363522	0.00185028	4.101	<0.001 *
	OTHER	383	0.0849611	0.0339177	0.00173311	4.102
AreaShape_Zernike_3_1	TUMOUR	386	0.0328	0.02038	0.00103732	-3.009	0.003
	OTHER	383	0.0372801	0.0209064	0.00106827	-3.009
AreaShape_Zernike_3_3	TUMOUR	386	0.0291376	0.0221128	0.00112551	-1.118	0.264
	OTHER	383	0.0309862	0.0237332	0.00121271	-1.117
AreaShape_Zernike_4_0	TUMOUR	386	0.0383236	0.0433833	0.00220815	0	<0.001 *
	OTHER	383	0.0383231	0.0358937	0.00183408	0
AreaShape_Zernike_4_2	TUMOUR	386	0.0317219	0.0195328	0.000994194	0.078	0.938
	OTHER	383	0.031617	0.0178258	0.000910858	0.078
AreaShape_Zernike_4_4	TUMOUR	386	0.0418579	0.0179848	0.000915402	1.245	0.214
	OTHER	383	0.0402793	0.0171711	0.000877402	1.245
AreaShape_Zernike_5_1	TUMOUR	386	0.0195971	0.0129386	0.00065856	-2.158	0.031
	OTHER	383	0.0215646	0.0123336	0.00063022	-2.158
AreaShape_Zernike_5_3	TUMOUR	386	0.0212576	0.0164887	0.000839252	-0.243	0.808
	OTHER	383	0.0215424	0.0159372	0.000814355	-0.244
AreaShape_Zernike_5_5	TUMOUR	386	0.0179023	0.0151647	0.000771861	-1.253	0.21
	OTHER	383	0.0192797	0.0153089	0.000782248	-1.253
AreaShape_Zernike_6_0	TUMOUR	386	0.0372475	0.0503679	0.00256366	0.855	0.393
	OTHER	383	0.034402	0.0414396	0.00211747	0.856
AreaShape_Zernike_6_2	TUMOUR	386	0.0264045	0.0229729	0.00116929	-0.893	0.372
	OTHER	383	0.0277811	0.0196498	0.00100406	-0.893
AreaShape_Zernike_6_4	TUMOUR	386	0.0271024	0.0248052	0.00126255	2.375	0.018
	OTHER	383	0.023406	0.0177533	0.00090715	2.378
AreaShape_Zernike_6_6	TUMOUR	386	0.0257489	0.0152338	0.000775381	-2.189	0.029
	OTHER	383	0.0281922	0.0157209	0.000803302	-2.188
AreaShape_Zernike_7_1	TUMOUR	386	0.01572	0.013195	0.000671609	-1.234	0.217
	OTHER	383	0.0168167	0.011366	0.000580776	-1.235
AreaShape_Zernike_7_3	TUMOUR	386	0.0173756	0.0192849	0.000981577	-1.52	0.129
	OTHER	383	0.0194215	0.0180241	0.00092099	-1.52
AreaShape_Zernike_7_5	TUMOUR	386	0.0168311	0.0180911	0.000920811	0.276	0.782
	OTHER	383	0.0165059	0.0142965	0.000730515	0.277
AreaShape_Zernike_7_7	TUMOUR	386	0.0148797	0.0147285	0.000749661	-1.206	0.228
	OTHER	383	0.0161622	0.0147509	0.000753735	-1.206
AreaShape_Zernike_8_0	TUMOUR	386	0.0372314	0.0468548	0.00238485	0.637	0.524
	OTHER	383	0.0352835	0.0373149	0.0019067	0.638
AreaShape_Zernike_8_2	TUMOUR	386	0.0271523	0.0266485	0.00135637	-0.284	0.776
	OTHER	383	0.0276457	0.021201	0.00108332	-0.284
AreaShape_Zernike_8_4	TUMOUR	386	0.0297865	0.0385828	0.00196381	1.12	0.263
	OTHER	383	0.027091	0.0270877	0.00138412	1.122
AreaShape_Zernike_8_6	TUMOUR	386	0.0242604	0.0236345	0.00120296	1.187	0.235
	OTHER	383	0.0223489	0.0209126	0.00106858	1.188
AreaShape_Zernike_8_8	TUMOUR	386	0.0232421	0.0262648	0.00133684	-0.338	0.736
	OTHER	383	0.0238197	0.0208297	0.00106435	-0.338
AreaShape_Zernike_9_1	TUMOUR	386	0.0144915	0.0164054	0.000835015	-0.095	0.924
	OTHER	383	0.0145916	0.0125523	0.000641393	-0.095
AreaShape_Zernike_9_3	TUMOUR	386	0.0159495	0.0198644	0.00101107	-0.952	0.342
	OTHER	383	0.0172968	0.019384	0.000990476	-0.952
AreaShape_Zernike_9_5	TUMOUR	386	0.0164264	0.0215762	0.0010982	-0.598	0.55
	OTHER	383	0.0173137	0.019477	0.000995229	-0.599
AreaShape_Zernike_9_7	TUMOUR	386	0.01489	0.0180734	0.00091991	-0.734	0.463
	OTHER	383	0.0158348	0.0175984	0.000899237	-0.735
AreaShape_Zernike_9_9	TUMOUR	386	0.0121494	0.0131472	0.000669176	-1.223	0.222
	OTHER	383	0.0133431	0.0139026	0.000710389	-1.223
Granularity_10_ResizedH	TUMOUR	386	3.31191	3.94004	0.200543	0.99	0.322
	OTHER	383	3.04044	3.65647	0.186837	0.99
Granularity_1_ResizedH	TUMOUR	386	46.5129	20.1993	1.02812	12.929	<0.001 *
	OTHER	383	30.1572	14.3702	0.734281	12.946
Granularity_2_ResizedH	TUMOUR	386	7.45653	7.94212	0.404244	-9.314	<0.001 *
	OTHER	383	13.6375	10.3165	0.527148	-9.304
Granularity_3_ResizedH	TUMOUR	386	2.90107	4.41998	0.224971	-8.903	<0.001 *
	OTHER	383	6.3557	6.19864	0.316736	-8.892
Granularity_4_ResizedH	TUMOUR	386	1.88	3.243	0.165	-9.185	<0.001 *
	OTHER	383	5.53	7.1	0.363	-9.161
Granularity_5_ResizedH	TUMOUR	386	2.75	3.997	0.203	-6.379	<0.001 *
	OTHER	383	5.09	5.998	0.307	-6.369
Granularity_6_ResizedH	TUMOUR	386	2.71	3.769	0.192	-7.636	<0.001 **
	OTHER	383	5.61	6.453	0.33	-7.622
Granularity_7_ResizedH	TUMOUR	386	3.13	4.682	0.238	-5.312	<0.001 *
	OTHER	383	5.04	5.315	0.272	-5.309
Granularity_8_ResizedH	TUMOUR	386	3.7	4.726	0.241	-1.502	0.133
	OTHER	383	4.18	4.103	0.21	-1.503
Granularity_9_ResizedH	TUMOUR	386	4.19	5.06	0.258	-2.195	0.028
	OTHER	383	5.08	6.086	0.311	-2.193
RadialDistribution_FracAtD_ResizedH_1of4	TUMOUR	386	0.0437752	0.0206946	0.00105333	7.576	<0.001 *
	OTHER	383	0.0340947	0.0140943	0.000720185	7.587
RadialDistribution_FracAtD_ResizedH_2of4	TUMOUR	386	0.200094	0.0804953	0.0040971	4.011	<0.001 *
	OTHER	383	0.179084	0.0637058	0.00325521	4.015
RadialDistribution_FracAtD_ResizedH_3of4	TUMOUR	386	0.38755	0.0978282	0.00497932	0.253	0.8
	OTHER	383	0.38567	0.107964	0.00551671	0.253
RadialDistribution_FracAtD_ResizedH_4of4	TUMOUR	386	0.36858	0.171959	0.00875249	-2.647	0.008
	OTHER	383	0.401151	0.169249	0.00864824	-2.647
RadialDistribution_MeanFrac_ResizedH_1of4	TUMOUR	386	1.12978	0.201062	0.0102338	10.774	<0.001 **
	OTHER	383	1.01035	0.0817578	0.00417763	10.805
RadialDistribution_MeanFrac_ResizedH_2of4	TUMOUR	386	1.09553	0.134977	0.00687017	11.716	<0.001 **
	OTHER	383	1.01077	0.0428721	0.00219066	11.754
RadialDistribution_MeanFrac_ResizedH_3of4	TUMOUR	386	1.01108	0.0681884	0.0034707	2.909	0.004
	OTHER	383	1.00049	0.020884	0.00106712	2.918
RadialDistribution_MeanFrac_ResizedH_4of4	TUMOUR	386	0.918616	0.156738	0.00797776	-7.249	<0.001 *
	OTHER	383	0.986471	0.0951995	0.00486447	-7.262
RadialDistribution_RadialCV_ResizedH_1of4	TUMOUR	386	0.03	0.059	0.003	6.684	<0.001 *
	OTHER	383	0.01	0.03	0.002	6.7
RadialDistribution_RadialCV_ResizedH_2of4	TUMOUR	386	0.0901055	0.0828132	0.00421508	7.725	<0.001 *
	OTHER	383	0.0546806	0.0347165	0.00177393	7.746
RadialDistribution_RadialCV_ResizedH_3of4	TUMOUR	386	0.117918	0.108026	0.00549837	10.565	<0.001 **
	OTHER	383	0.0573026	0.0307558	0.00157155	10.6
RadialDistribution_RadialCV_ResizedH_4of4	TUMOUR	386	0.106763	0.121409	0.00617956	9.195	<0.001 **
	OTHER	383	0.0473456	0.0355252	0.00181525	9.225
Texture_AngularSecondMoment_ResizedH_3	TUMOUR	386	0.130851	0.203962	0.0103814	0.196	0.845
	OTHER	383	0.128414	0.133955	0.00684477	0.196
Texture_Contrast_ResizedH_3	TUMOUR	386	7.27792	4.80393	0.244514	-1.356	0.176
	OTHER	383	7.73219	4.48254	0.229047	-1.356
Texture_Correlation_ResizedH_3	TUMOUR	386	0.0163908	0.331643	0.0168802	0.214	0.831
	OTHER	383	0.0109862	0.368571	0.0188331	0.214
Texture_DifferenceEntropy_ResizedH_3	TUMOUR	386	1.46958	0.429572	0.0218646	0.106	0.916
	OTHER	383	1.46657	0.35297	0.0180359	0.106
Texture_DifferenceVariance_ResizedH_3	TUMOUR	386	2.3643	1.45199	0.0739042	-0.282	0.778
	OTHER	383	2.39219	1.28776	0.0658015	-0.282
Texture_Entropy_ResizedH_3	TUMOUR	386	2.62293	0.896709	0.0456413	4.034	<0.001 *
	OTHER	383	2.38686	0.715352	0.0365528	4.037
Texture_Gabor_ResizedH_3	TUMOUR	386	56.3895	42.044	2.13998	-3.97	<0.001 *
	OTHER	383	67.9217	38.4212	1.96323	-3.971
Texture_InfoMeas1_ResizedH_3	TUMOUR	386	-0.331521	0.215138	0.0109502	6.108	<0.001 *
	OTHER	383	-0.428926	0.226951	0.0115967	6.107
Texture_InfoMeas2_ResizedH_3	TUMOUR	386	0.74463	0.231591	0.0117877	-4.449	<0.001 *
	OTHER	383	0.811531	0.182332	0.00931671	-4.453
Texture_InverseDifferenceMoment_ResizedH_3	TUMOUR	386	0.383024	0.162798	0.00828619	3.008	0.003
	OTHER	383	0.351434	0.125972	0.00643689	3.011
Texture_SumAverage_ResizedH_3	TUMOUR	386	8.89572	2.21937	0.112963	-6.84	<0.001 *
	OTHER	383	9.91838	1.91405	0.0978036	-6.844
Texture_SumEntropy_ResizedH_3	TUMOUR	386	1.86959	0.585387	0.0297954	2.227	0.026
	OTHER	383	1.78488	0.461635	0.0235885	2.229
Texture_SumVariance_ResizedH_3	TUMOUR	386	6.22627	3.10967	0.158278	1.841	0.066
	OTHER	383	5.80658	3.21078	0.164063	1.841
Texture_Variance_ResizedH_3	TUMOUR	386	3.08756	1.58735	0.0807942	2.06	0.04
	OTHER	383	2.85282	1.57315	0.0803841	2.06
